# Supplementary material for: IL-6 trans-signaling induces plasminogen activator inhibitor-1 from vascular endothelial cells in cytokine release syndrome
Source: PubMed Central journal article supplement (PMC7486751; doi:10.1073/pnas.2010229117), 2020-08-21
Supplement: pnas.2010229117.sapp.pdf [file pnas.2010229117.sapp.pdf]

Supplementary Information for

**IL-6 trans-signaling induces plasminogen activator inhibitor-1 from vascular endothelial cells in cytokine release syndrome**

Sujin Kang, Toshio Tanaka, Hitomi Inoue, Chikako Ono, Shoji Hashimoto, Yoshiyuki Kioi, Hisatake Matsumoto, Hiroshi Matsuura, Tsunehiro Matsubara, Kentaro Shimizu, Hiroshi Ogura, Yoshiharu Matsuura, Tadamitsu Kishimoto

Corresponding author: Tadamitsu Kishimoto  
Email: [kishimoto@ifrec.osaka-u.ac.jp](mailto:kishimoto@ifrec.osaka-u.ac.jp)

**This PDF file includes:**

Figures S1 to S3  
Tables S1, S2

Figure S1

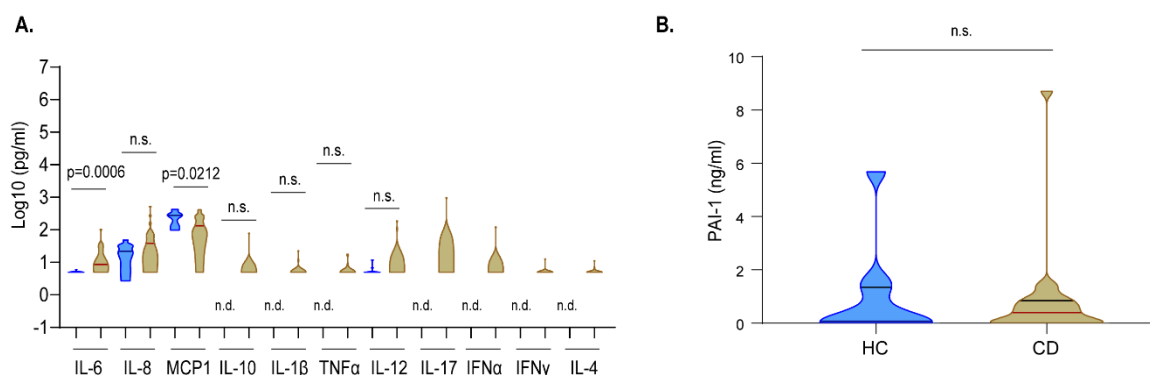

**Fig. S1. Cytokine and chemokine profiles of chronic disease patients.** Nineteen patients with chronic diseases included 8 with rheumatoid arthritis, two each with polymyositis/dermatomyositis, systemic sclerosis, and polymyalgia rheumatica, and one each with adult-onset Still disease, Behçet disease, systemic lupus erythematosus, IgG4-related disease, and mixed connective tissue disease, and healthy control (n=10) (A, B) Cytokine, chemokine (A) and PAI-1 (B) levels were measured in sera of patients with cytokine release syndrome. Comparisons were made by the Mann-Whitney U-test followed by correction (A), and the unpaired two-tailed *t*-test (B). Statistical comparisons are indicated, ns: non-significant; nd: non-detectable. Bar indicates the median.

Figure S2

A.

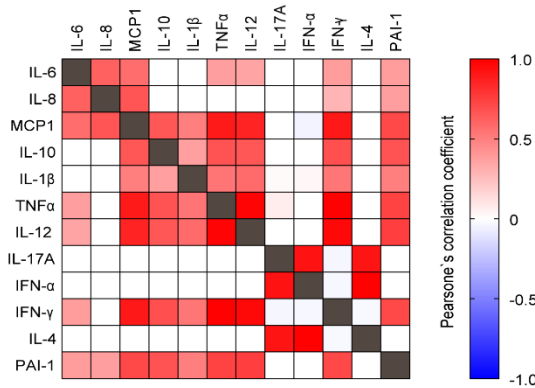

B.

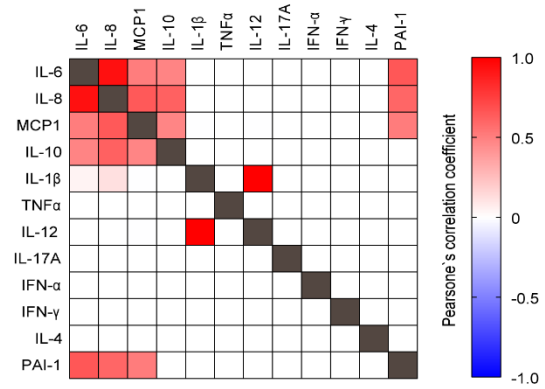

C.

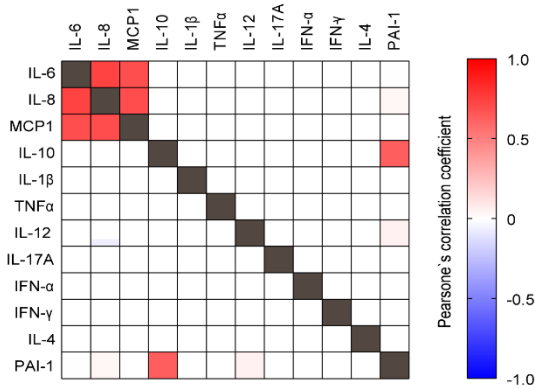

**Fig. S2. Pearson's correlation of each cytokine in CRS patients.** Hierarchical clustering of Pearson's correlations between cytokines and PAI-1 in patients with each cytokine release syndrome (Sepsis, A; ARDS, B; burns, C).  $r$ , Pearson correlation of determination. All data with  $p < 0.05$  was shown.

Figure S3

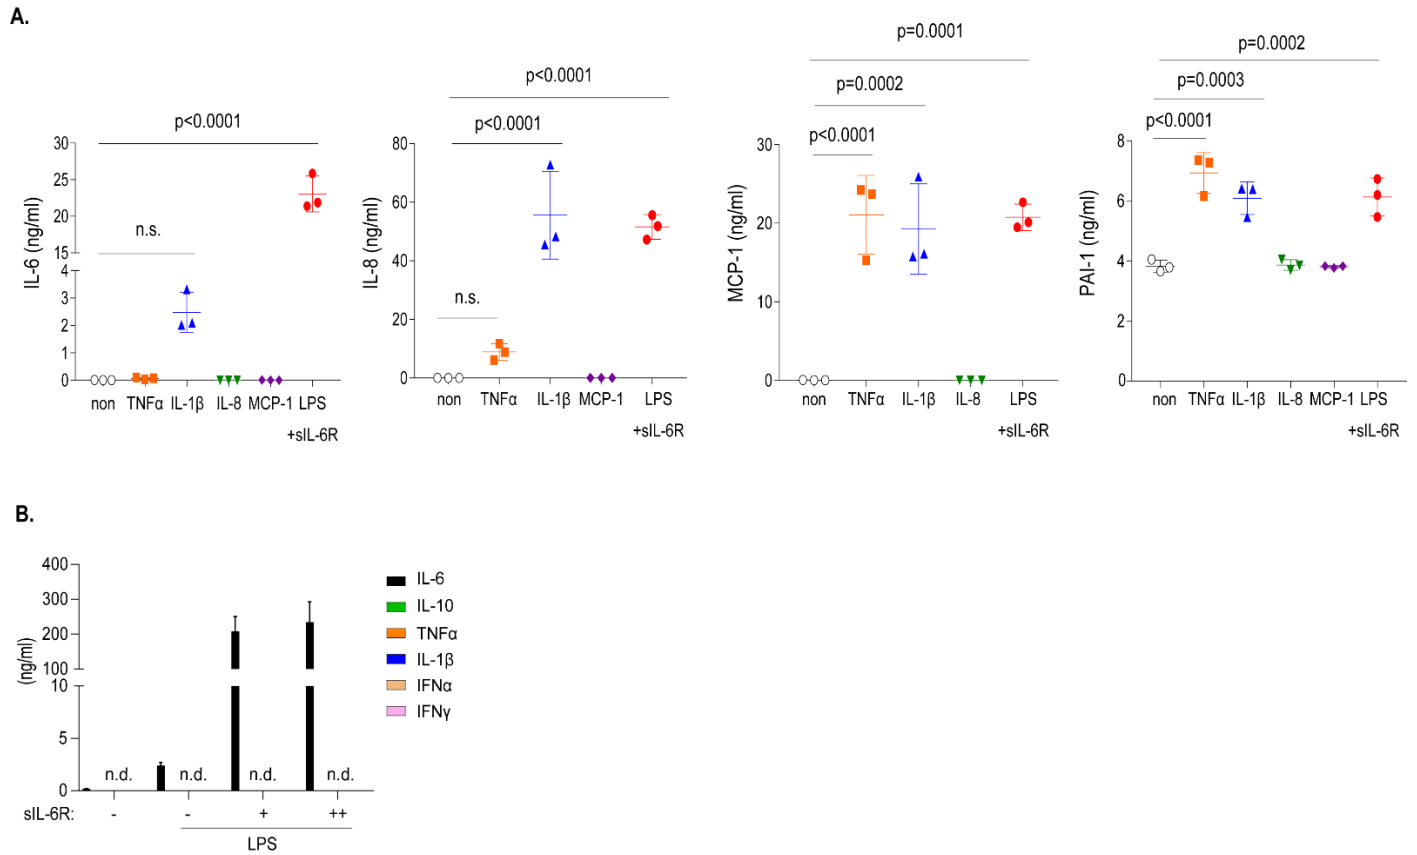

**Fig. S3. Responses of HUVECs by stimulation of several cytokines or LPS with sIL-6R.** HUVECs were treated with TNF $\alpha$  (10 ng/ml), IL-1 $\beta$  (5 ng/ml), MCP-1 (100 ng/ml), IL-8 (50 ng/ml) LPS and sIL-6R. Levels of IL-6, IL-8, MCP-1 and PAI-1 in the culture supernatants after 48 h are shown. n.s., not significant. *P*-values were determined by unpaired one-way ANOVA (A). The indicated cytokines in the supernatant of HUVECs of Fig. 3A were detected by ELISA (B). Statistical comparisons are indicated, ns: non-significant; nd: non-detectable. Data are representative of three independent experimental replicates, and are presented as means  $\pm$  SD [*n* = 3 samples per group (A)].

TABLE S1

|                                           |                    |
|-------------------------------------------|--------------------|
| <b>Healthy control (n=36)</b>             |                    |
| Male gender (n, %)                        | 35/3 (88%)         |
| <b>Sepsis (n=37)</b>                      |                    |
| Age                                       | 67 (53–78)         |
| Male gender (n, %)                        | 25/12 (67%)        |
| Mortality (%)                             | 14 (37.8%)         |
| APACH II score                            | 19 (15–27)         |
| SOFA score                                | 9 (5.5–11.5)       |
| <b>ARDS (n=19)</b>                        |                    |
| Age                                       | 70 (60–80)         |
| Male gender (n, %)                        | 12/7 (63%)         |
| Mortality (%)                             | 7 (36.8%)          |
| APACH II score                            | 25 (22–28)         |
| SOFA score                                | 9 (7.5–12)         |
| PaO <sub>2</sub> : FiO <sub>2</sub> ratio | 126.3 (91.5–177.7) |
| <b>Burns (n=35)</b>                       |                    |
| Age                                       | 56 (41–77)         |
| Male gender (n, %)                        | 18/17 (51%)        |
| Mortality (%)                             | 5 (14%)            |
| SOFA score                                | 3 (0.75–6)         |
| % TBSA                                    | 30 (33–52)         |
| BI                                        | 25 (30–35)         |
| PBI                                       | 82 (70.5–98)       |

**Table S1. Characteristic features and clinical course of patients with sepsis, ARDS and burns.** %TBSA, percentage of the total body surface area; APACHE, Acute Physiology and Chronic Health Evaluation; BI, burn index; PBI, prognostic burn index; SOFA, Sequential Organ Failure Assessment. PaO<sub>2</sub>, partial pressure of arterial oxygen; FiO<sub>2</sub>, percentage of inspired oxygen. Data are shown as group number or median (interquartile range). Missing values were not included in the table.

TABLE S2

| Case | Age/Gender | Complications                      | Anti-viral drugs combined with TCZ | Requiring O2 conc. and laboratory findings before TCZ                                                  | Clinical features and laboratory findings after TCZ                                                                                                                                                             | Patient condition           |
|------|------------|------------------------------------|------------------------------------|--------------------------------------------------------------------------------------------------------|-----------------------------------------------------------------------------------------------------------------------------------------------------------------------------------------------------------------|-----------------------------|
| 1    | 72/M       | NTM, COPD, Lower pharyngeal cancer | F+C                                | O2 3L/min, Lym 175/ $\mu$ L, CRP 8.62 mg/dL, Ferritin 153.1 ng/mL                                      | Day 5: CRP 0.30, Lym 470<br>Day 8: O2 2L/min<br>Day 21: CRP 0.05, Lym 970, Ferritin 77.2<br>Day 25: SARS-CoV-2 (-)<br>Day 27: Discharge with HOT                                                                | Cure                        |
| 2    | 41/M       |                                    | F+C                                | O2 2~3 L/min, Lym 530/ $\mu$ L, CRP 13.51 mg/dL, Ferritin 1522 ng/mL                                   | Day 5: O2 free<br>Day 5: CRP 1.07, Lym 1150, Ferritin 889.4<br>Day 11: CRP 0.10, Lym 1580, Ferritin 652.9<br>Day 11: SARS-CoV-2 (-)<br>Day 12: Discharge                                                        | Cure                        |
| 3    | 63/M       | HT                                 | F+C                                | O2 3~5 L/min, Lym 1280/ $\mu$ L, CRP 11.53 mg/dL, Ferritin 1531.8 ng/mL                                | Day 3: CRP 1.98, Lym 990, Ferritin 943.9<br>Day 7: O2 free<br>Day 10: CRP 0.12, Lym 1664, Ferritin 592.5<br>Day 15: SARS-CoV-2 (-)<br>Day 16: Discharge                                                         | Cure                        |
| 4    | 68/M       | DM                                 | F+C                                | O2 2~6 L/min, Lym 999/ $\mu$ L, CRP 2.33 mg/dL, Ferritin 880.6 ng/mL                                   | Day 5: O2 free<br>Day 7: CRP 0.17, Lym 1400, Ferritin 828.5<br>Day 13: CRP 0.06, Lym 1350, ferritin 1120.8<br>Day 14: SARS-CoV-2 (-)<br>Day 15: Discharge                                                       | Cure                        |
| 5    | 71/M       | DM                                 | L/R+C                              | Under artificial ventilation (FiO2 0.35~0.8), Lym 2130/ $\mu$ L, CRP 7.47 mg/dL, Ferritin 4383.4 ng/mL | Day 4: CRP 1.13, Lym 1010<br>Day 12: Under artificial ventilation (FiO2 0.3)<br>Day 25: SARS-CoV-2 (-)                                                                                                          | Improvement                 |
| 6    | 79M        |                                    | F+C                                | O2 4L/min, Lym 860/ $\mu$ L, CRP 8.57 mg/dL, Ferritin 1110.7 ng/mL                                     | Day 2: Intubation and transfer to other hospital<br>Day 2: CRP 3.9, Lym 660, Ferritin 1505.6<br>Day 13: Extubation and transfer to our hospital<br>Day 13: CRP 0.46, Lym 581, Ferritin 800.4<br>Day 15: O2 free | Recovery from deterioration |
| 7    | 48/M       | DM<br>HT<br>Obesity<br>SAS         | F+C                                | O2 6L/min, Lym 82/ $\mu$ L 0, CRP 3.78 mg/dL, Ferritin 3355.4 ng/mL                                    | Day 1: Intubation and transfer to other hospital<br>Day 9: Extubation and transfer to our hospital<br>Day 13: CRP 0.12, Lym 278, Ferritin 3700.9 followed by mPSL pulse                                         | Recovery from deterioration |

**Table S2. Characteristic features and clinical course of patients with COVID-19 treated with tocilizumab.** TCZ: tocilizumab; DM: diabetes mellitus; HT: hypertension; NTM: non-tuberculous mycobacteriosis; COPD: chronic obstructive pulmonary diseases; F: favipiravir; C: ciclesonide; L/R:lopinavir/ritonavir.
